# Supplementary material
Source: publisher figshare collection journal article supplement (https://acs.figshare.com/ndownloader/files/3747085)
Supplement: Supplementary file 1 [file 3747085]

## Solid State Packing and Photoreactivity of Alkali Metal Salts of *trans*, *trans*-Muconate

Goutam Kumar Kole,<sup>a,b</sup> Anjana Chanthapally,<sup>a</sup> Geok Kheng Tan<sup>a</sup> and Jagadese J. Vittal<sup>a,\*</sup>

<sup>a</sup> Department of Chemistry, National University of Singapore, 3 Science Drive 3, Singapore – 117543. Fax: +65 67791691; Tel: +65 65162975; E-mail: [chmjv@nus.edu.sg](mailto:chmjv@nus.edu.sg)

<sup>b</sup> Chemistry Division, Bhabha Atomic Research Centre, Mumbai – 400085, India.

### Experimental Section

*Trans,trans*-H<sub>2</sub>muco, LiOH, NaOH, KOH etc were purchased from various commercial sources. The alkali metal hydroxides were dissolved in water and their aqueous solutions were added drop wise to *tr, tr*-H<sub>2</sub>muco in water until it dissolved to produce colorless solution. The diffraction quality single crystals were obtained by slowly evaporating the aqueous solutions.

<sup>1</sup>H NMR spectra were recorded with a Bruker ACF 300 FT-NMR spectrometer by using D<sub>2</sub>O as the solvent for all compounds. Elemental analyses were carried out at the Micro-analytical Laboratory, Department of Chemistry, National University of Singapore. Thermogravimetric analyses were recorded with a TA SDT 2960 TGA Thermal Analyzer. Samples were heated from room temperature to 600 °C with a heating rate of 5 °C min<sup>-1</sup> under nitrogen gas flow. Powder X-ray diffraction (PXRD) patterns were obtained with a D5005 Bruker X-ray diffractometer and Cu-K $\alpha$  radiation.

Single crystal X-ray diffraction data were collected for structure determination with a Bruker APEX diffractometer equipped with a CCD detector and graphite monochromated Mo-K $\alpha$  ( $\lambda$ =0.71073 Å) radiation. Empirical absorption corrections were applied to the data by using the SADABS program<sup>1</sup> and the ShelxTL crystallographic package<sup>2</sup> was used for all calculations.

UV irradiation experiments were conducted with a Luzchem photoreactor at a wavelength of 354 nm and an intensity of 1.75 mW cm<sup>-2</sup>. About 20 mg of each compound was packed between two Pyrex glass slides and the UV irradiation experiments were completed by turning the packed glass slides for each sample half-way during their irradiation to ensure uniform irradiation. <sup>1</sup>H NMR spectra were acquired to determine the percentages of various compounds in mixture by calculation on the integration values.

### References

1. Sheldrick, G. M. SADABS Software for empirical absorption corrections, Version 2.05, University of Göttingen, Göttingen, **1996**.
2. (a) Sheldrick, G. M. *Acta Crystallogr. Sect. A* **2008**, *64*, 112-122; (b) Müller, P.; Herbst-Irmer, R.; Spek, A. L.; Schneider, T. R.; Sawaya, M. R. *Crystal Structure Refinement: A Crystallographers Guide to SHELXL*; Ed.: Müller, P.; Oxford University Press, Oxford: **2006**.

Table 1: Crystallographic data for **1** and **3**. CCDC numbers 1412301-1412302

| Compounds                                       | <b>1</b>                                                     | <b>3</b>                                                    |
|-------------------------------------------------|--------------------------------------------------------------|-------------------------------------------------------------|
| Formula                                         | C <sub>6</sub> H <sub>4</sub> O <sub>4</sub> Li <sub>2</sub> | C <sub>6</sub> H <sub>4</sub> O <sub>4</sub> K <sub>2</sub> |
| <i>M</i>                                        | 153.97                                                       | 218.29                                                      |
| <i>T</i> (K)                                    | 100(2)                                                       | 100(2)                                                      |
| $\lambda$ (Å)                                   | 0.71073                                                      | 0.71073                                                     |
| Crystal syst.                                   | Monoclinic                                                   | Monoclinic                                                  |
| Space group                                     | <i>P</i> 2 <sub>1</sub> / <i>c</i>                           | <i>P</i> 2 <sub>1</sub> / <i>n</i>                          |
| <i>a</i> (Å)                                    | 7.763(1)                                                     | 10.765(2)                                                   |
| <i>b</i> (Å)                                    | 5.0161(6)                                                    | 3.9739(7)                                                   |
| <i>c</i> (Å)                                    | 8.7526(11)                                                   | 11.261(2)                                                   |
| $\beta$ (°)                                     | 115.232(3)                                                   | 117.978(2)                                                  |
| Volume (Å <sup>3</sup> )                        | 308.31(7)                                                    | 425.43(13)                                                  |
| <i>Z</i>                                        | 2                                                            | 2                                                           |
| <i>D</i> <sub>calcd</sub> (g cm <sup>-3</sup> ) | 1.659                                                        | 1.704                                                       |
| $\mu$ (mm <sup>-1</sup> )                       | 0.134                                                        | 1.082                                                       |
| Reflns col.                                     | 2037                                                         | 2695                                                        |
| Ind. Reflns.                                    | 708                                                          | 962                                                         |
| Goof on F <sup>2</sup>                          | 1.068                                                        | 1.261                                                       |
| Final R[ <i>I</i> > 2σ] <sup>a</sup>            | 0.0392                                                       | 0.0372                                                      |
| <i>R</i> 1                                      |                                                              |                                                             |
| <i>wR</i> 2 <sup>b</sup>                        | 0.1045                                                       | 0.1183                                                      |

$$^a R1 = \Sigma ||F_o| - |F_c|| / \Sigma |F_o|, ^b wR2 = [\Sigma w(F_o^2 - F_c^2)^2 / \Sigma w(F_o^2)]^{1/2}$$

### Elemental Analysis data for **1** – **3**.

Analysis found for **1** (%), C, 46.54, H, 3.15; C<sub>6</sub>H<sub>4</sub>O<sub>4</sub>Li<sub>2</sub> requires C, 46.80, H, 2.62.

Analysis found for **2** (%), C, 38.86, H, 2.31; C<sub>6</sub>H<sub>4</sub>O<sub>4</sub>Na<sub>2</sub> requires C, 38.73, H, 2.17.

Analysis found for **3** (%), C, 32.84, H, 2.06; C<sub>6</sub>H<sub>4</sub>O<sub>4</sub>K<sub>2</sub> requires C, 33.01, H, 1.85.

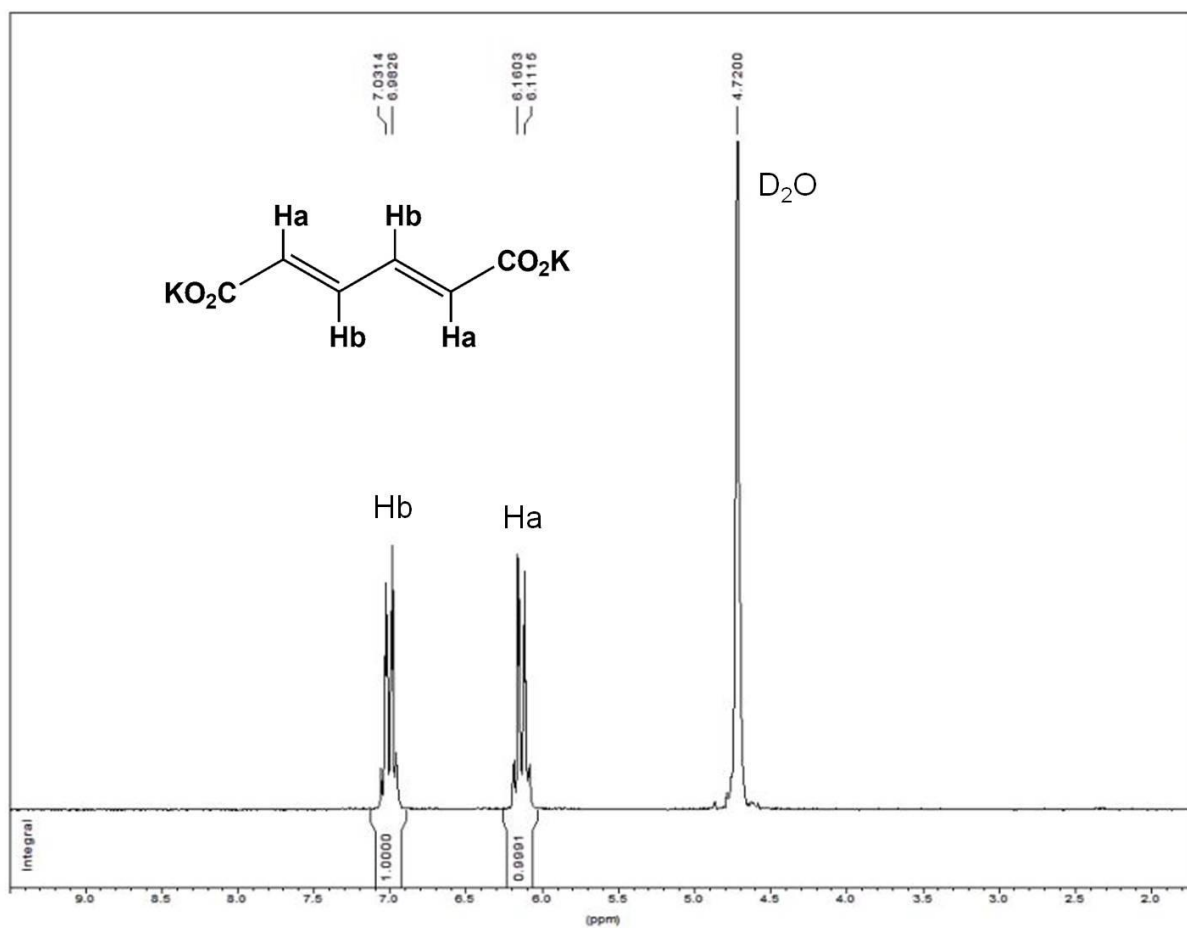

Figure S1: The  $^1H$  NMR spectrum (300 MHz,  $D_2O$ ) of  $K_2muco$

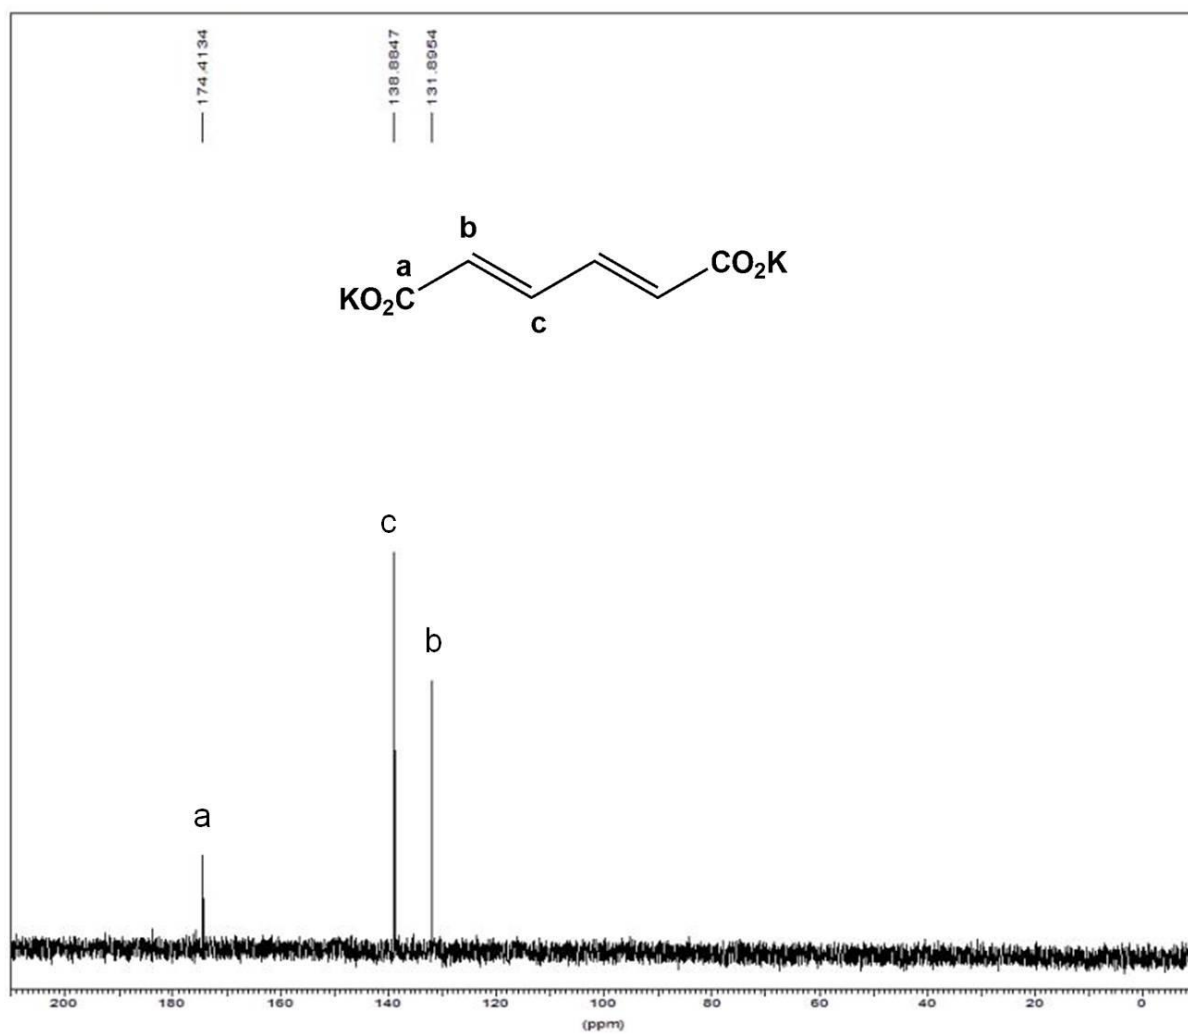

Figure S2: The  $^{13}\text{C}$  NMR spectrum (300 MHz,  $\text{D}_2\text{O}$ ) of  $\text{K}_2\text{muco}$

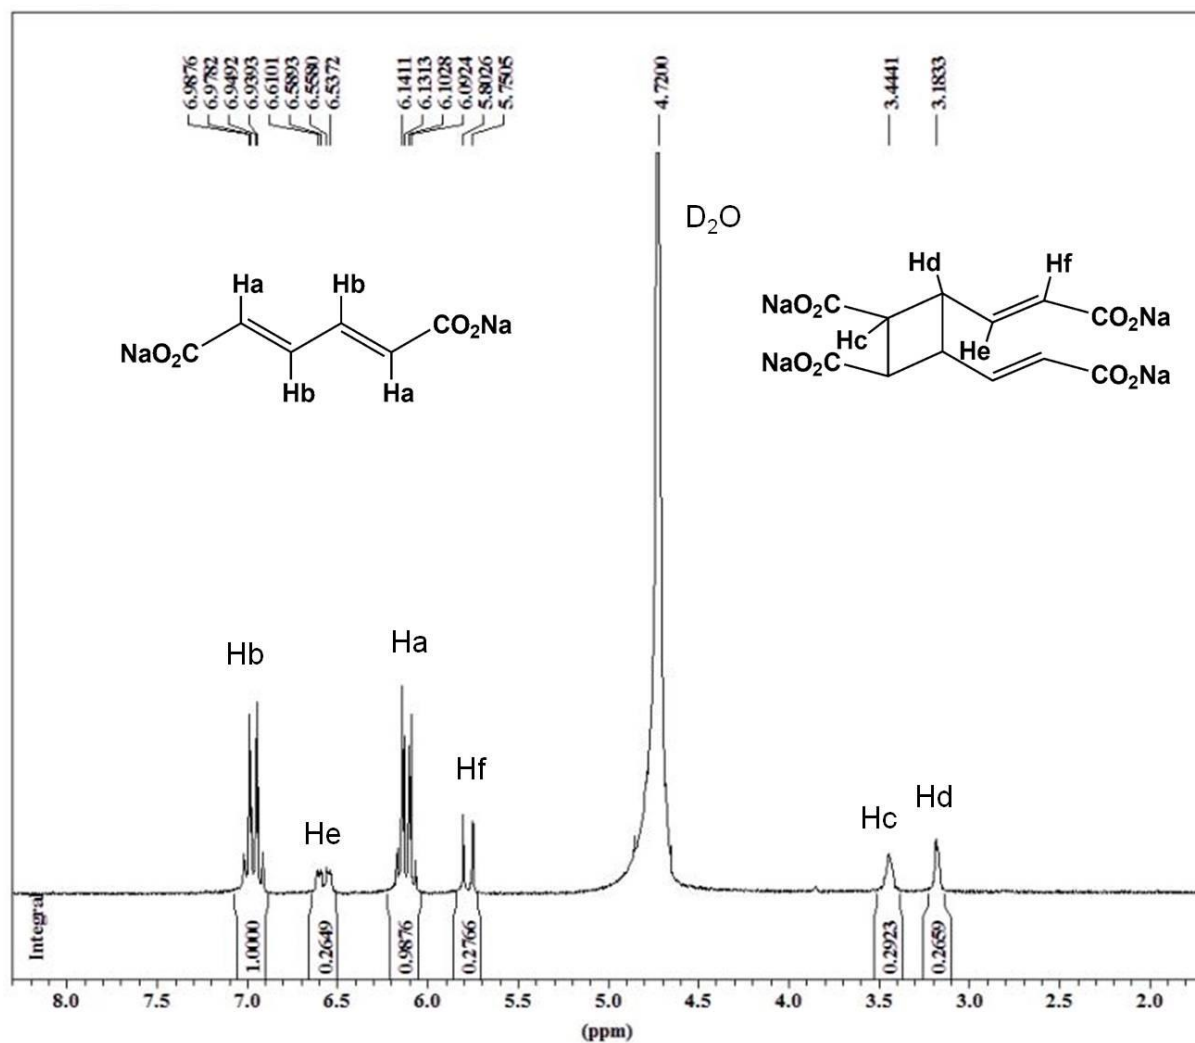

Figure S3: The  $^1\text{H}$  NMR spectrum (300 MHz,  $\text{D}_2\text{O}$ ) of  $\text{Na}_2\text{muco}$  after irradiation for 1 h under UV light. No cycloocta-3,7-diene-1,2,5,6-tetracarboxylate (**B**) was detected to form which supports stepwise mechanism.

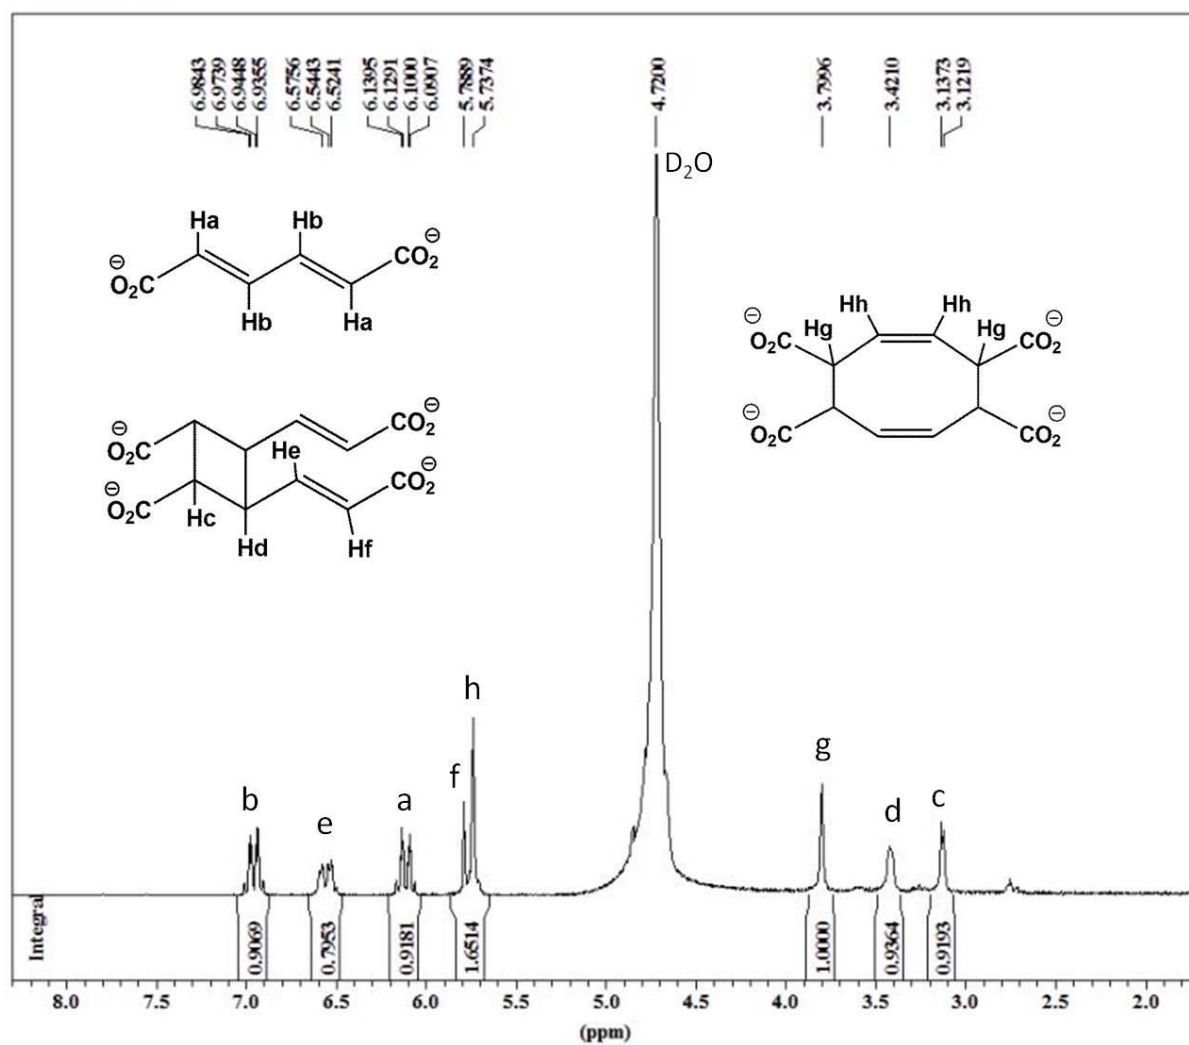

Figure S4: The  $^1\text{H}$  NMR spectrum (300 MHz,  $\text{D}_2\text{O}$ ) of  $\text{Na}_2\text{muco}$  after irradiation for 3 h under UV light. It shows the presence of both the dimer products.

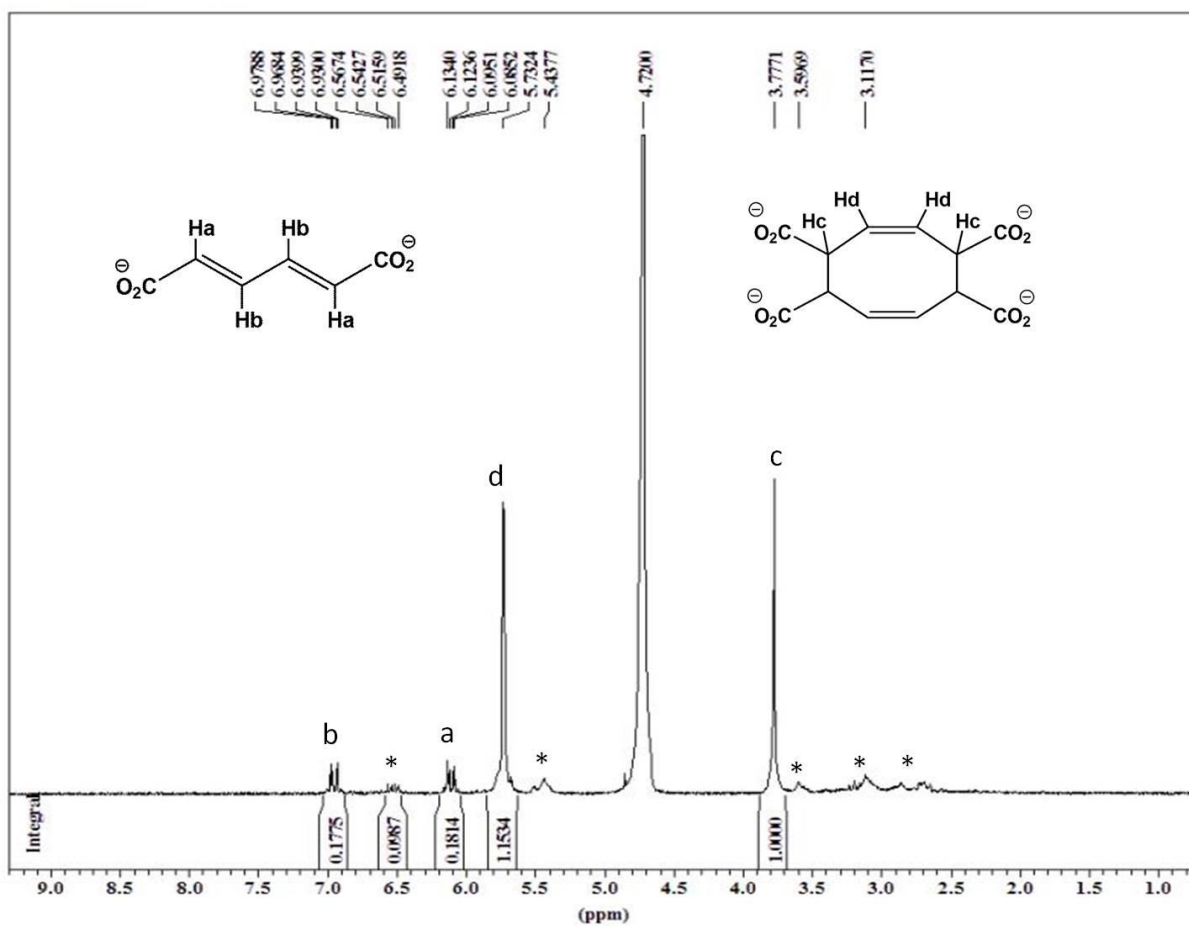

Figure S5: The  $^1\text{H}$  NMR spectrum (300 MHz,  $\text{D}_2\text{O}$ ) of  $\text{Na}_2\text{muco}$  after irradiation for 18 h under UV light. The asterisked peaks represent the minor products **C** and **D**.

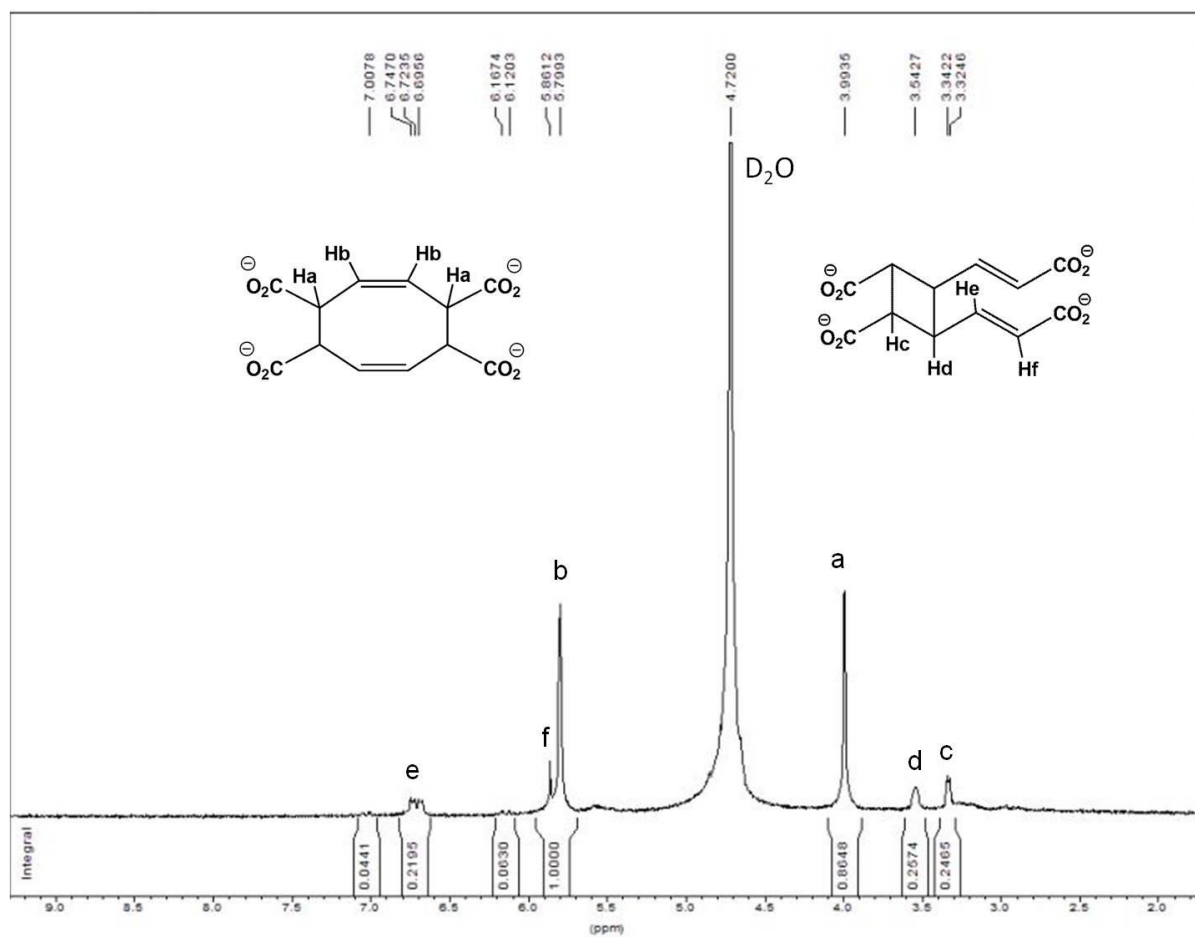

Figure S6: The  $^1\text{H}$  NMR spectrum (300 MHz,  $\text{D}_2\text{O}$ ) of  $\text{K}_2\text{muco}$  after irradiation for 10 h under UV light. The minor dimer products (**C**, **D**) are not yet observed.



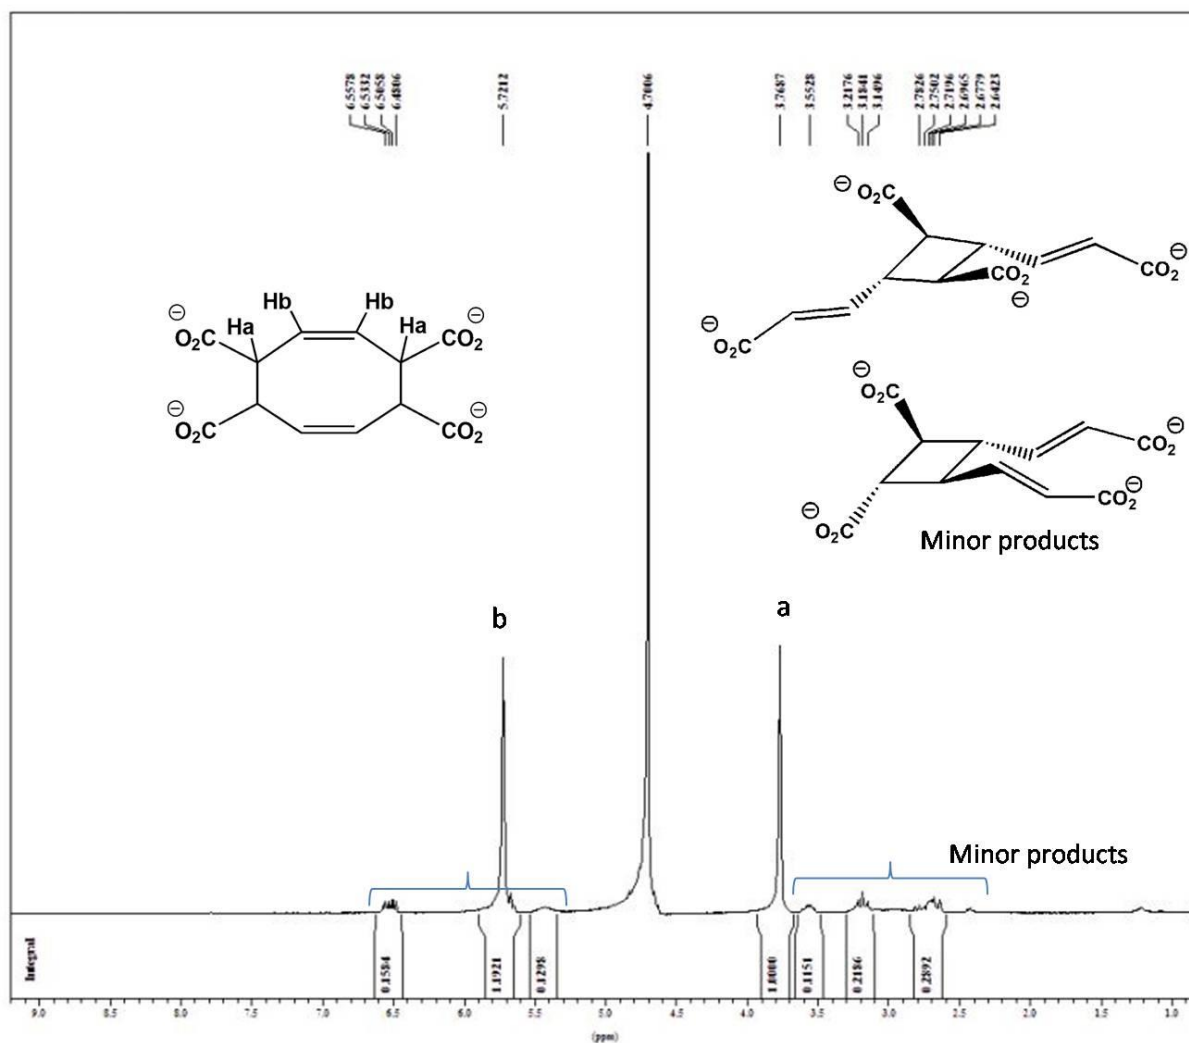

Figure S7: The  $^1\text{H}$  NMR spectrum (300 MHz,  $\text{D}_2\text{O}$ ) of  $\text{K}_2\text{muco}$  after irradiation for 18 h under UV light and then mild heating. All the *muco* is converted to various products as shown.

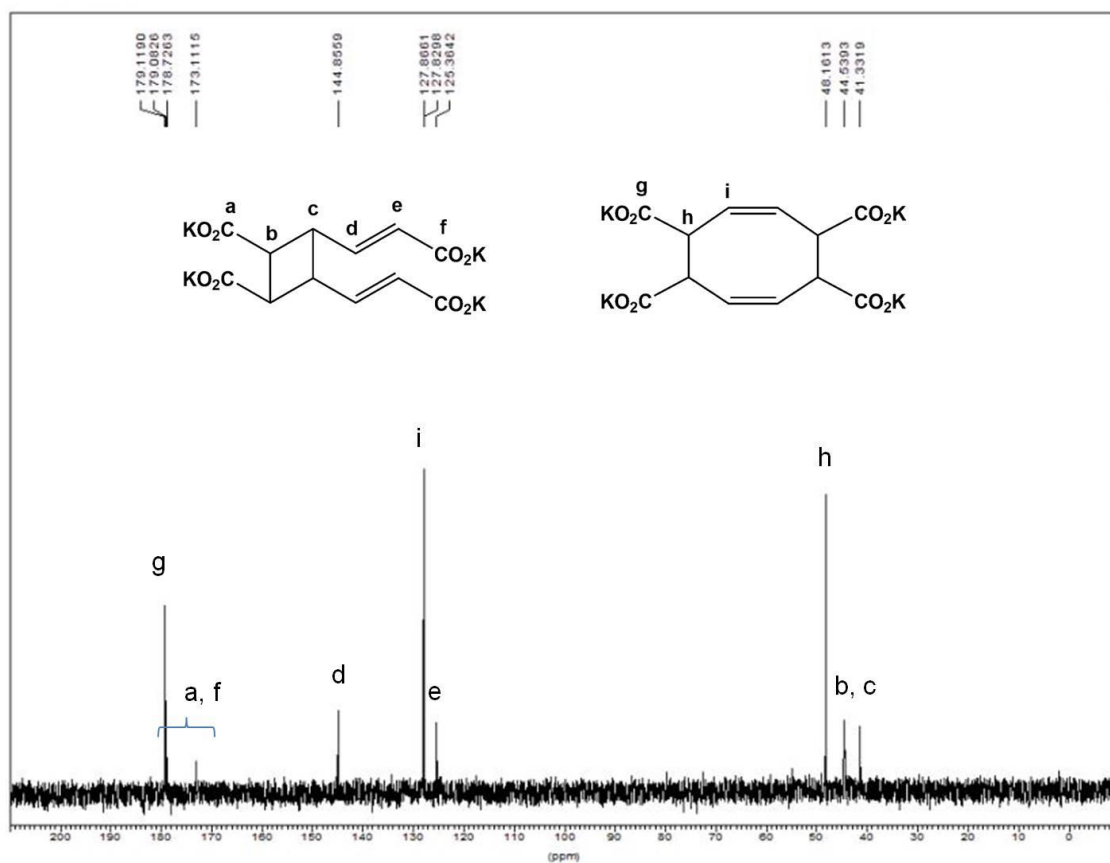

Figure S8: The  $^{13}\text{C}$  NMR spectrum (300 MHz,  $\text{D}_2\text{O}$ ) of  $\text{K}_2\text{muco}$  after irradiation for 18 h under UV light. It shows both the products **A** and **B**.

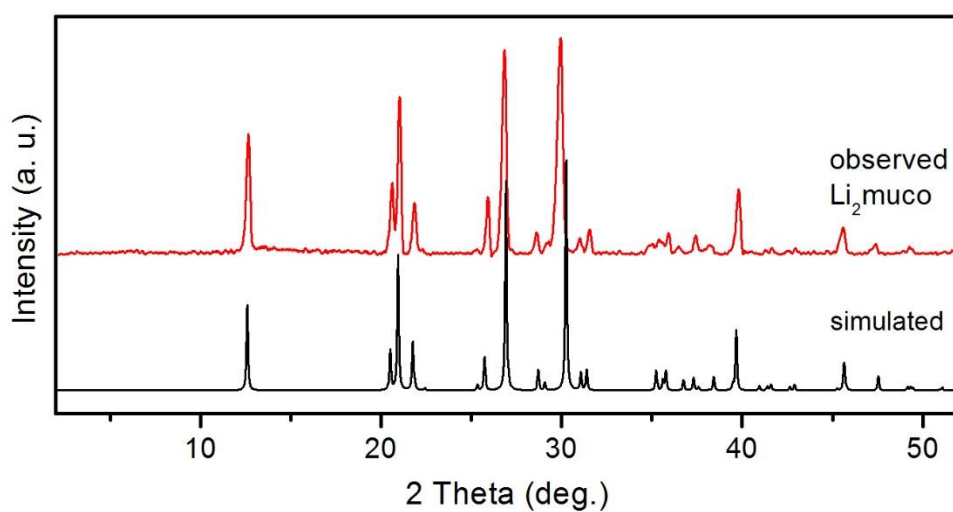

Figure S9: The overlay plot of the simulated and observed PXRD patterns for  $\text{Li}_2\text{muco}$ .

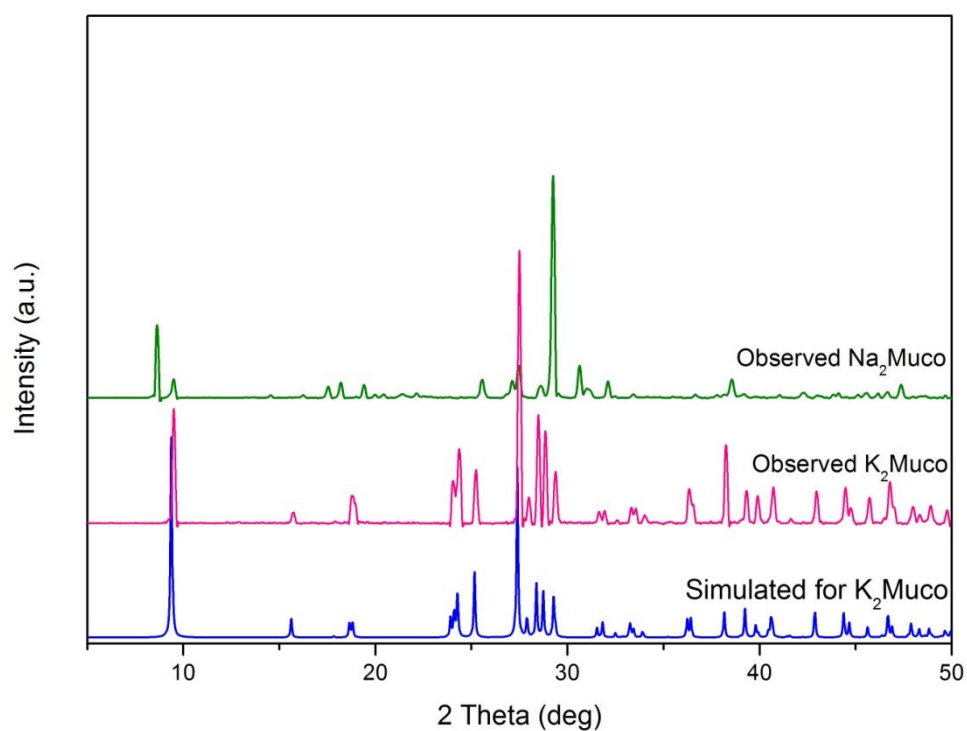

Figure S10: The overlay plot of the simulated and observed PXRD patterns for  $\text{K}_2\text{muco}$  and observed pattern for  $\text{Na}_2\text{muco}$ .

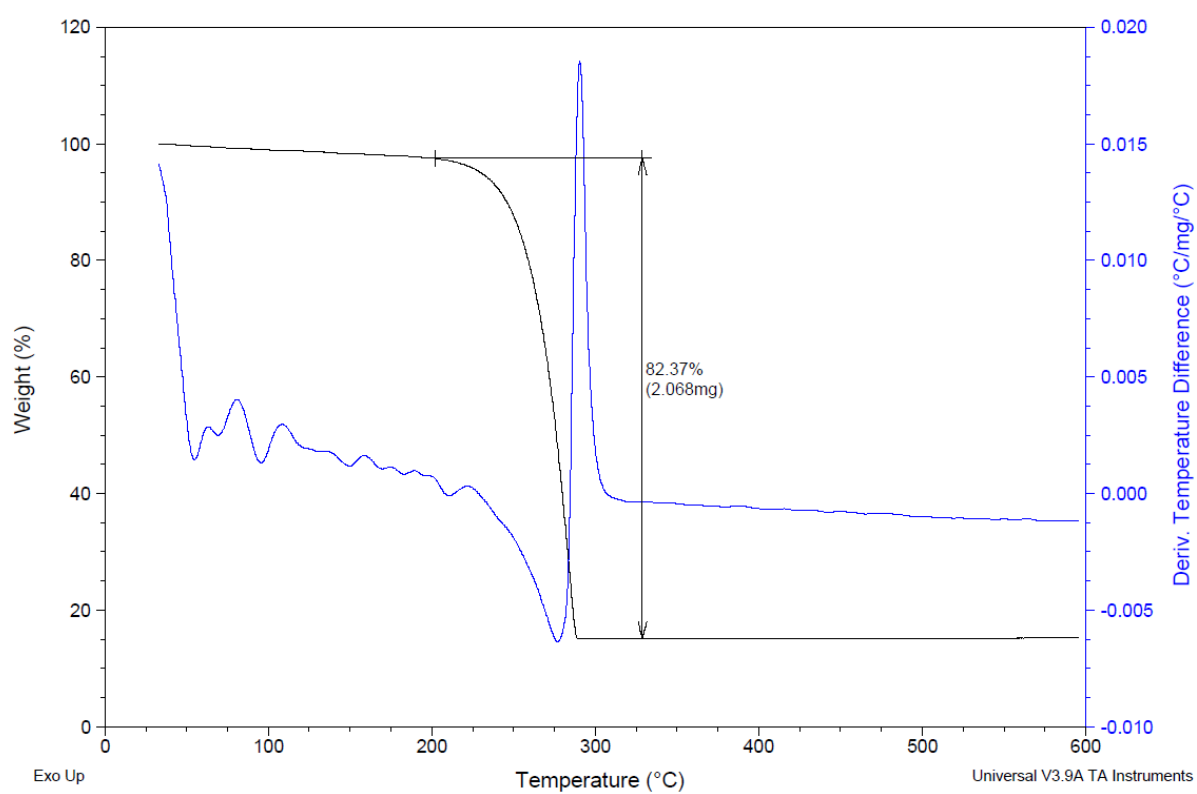

Figure S11: TGA plot for  $\text{Li}_2\text{muco}$ .

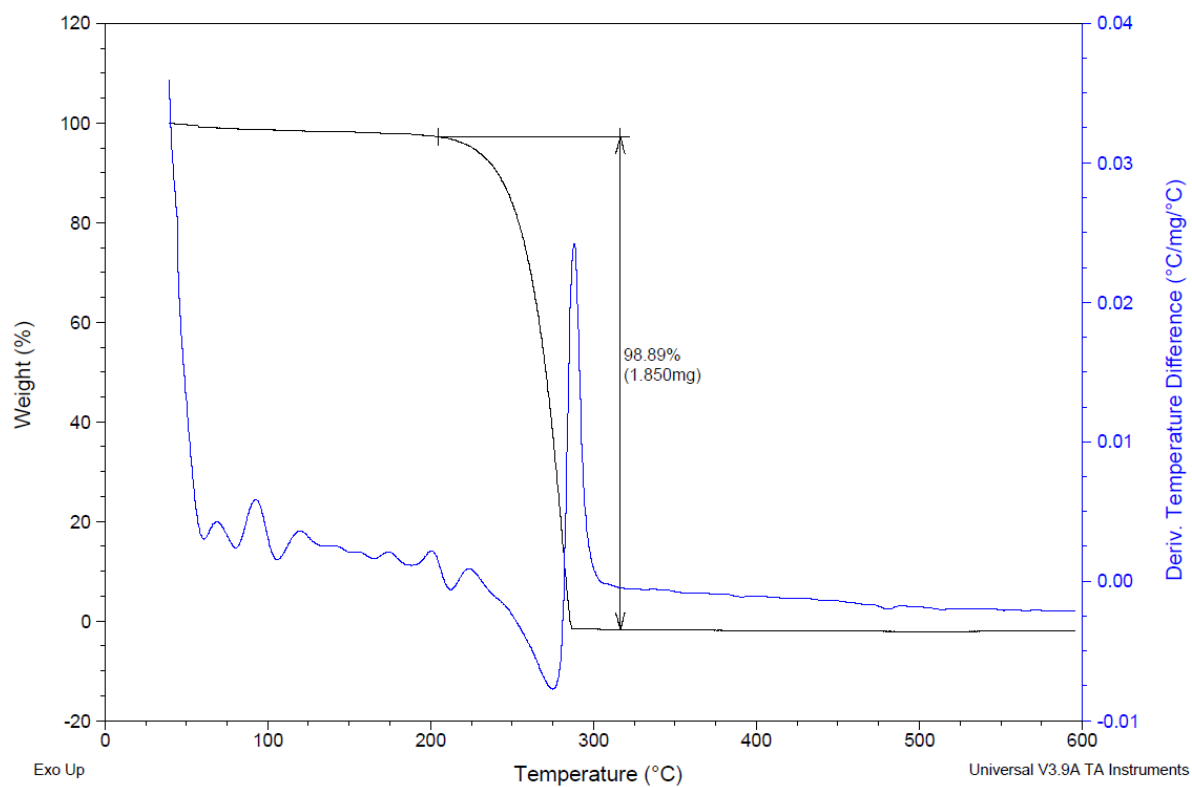

Figure S12: TGA plot for  $\text{Na}_2\text{muco}$ .

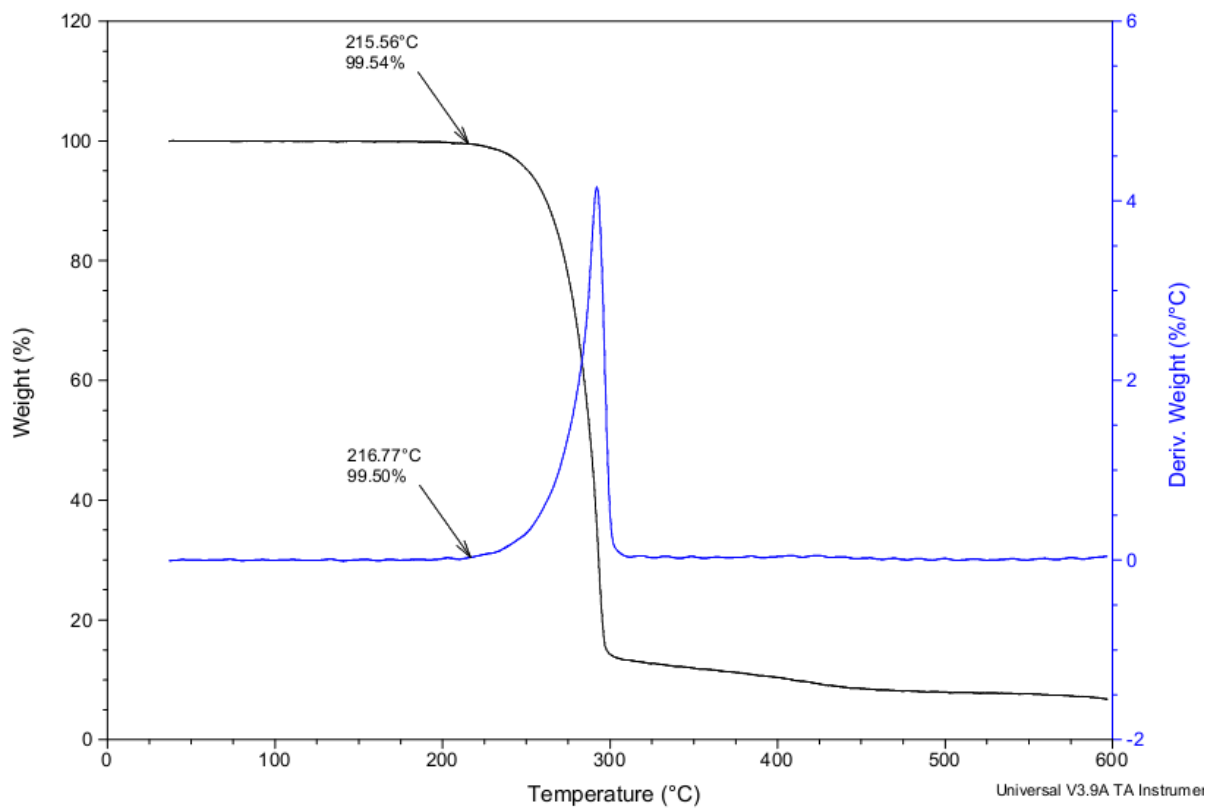

Figure S13: TGA plot for  $\text{K}_2\text{muco}$ .
